# **Bacterial influence on the maintenance of symbiotic yeast through *Drosophila* metamorphosis**

Running title: Bacterial influence on yeast maintenance

Robin Guilhot<sup>1\*</sup>, Antoine Rombaut<sup>1</sup>, Anne Xuéreb<sup>1</sup>, Kate Howell<sup>2</sup>, Simon Fellous<sup>1</sup>

<sup>1</sup> CBGP, INRAE, CIRAD, IRD, Montpellier SupAgro, Univ Montpellier, Montpellier, France

<sup>2</sup> Faculty of Veterinary and Agricultural Sciences, University of Melbourne, Parkville, Vic 3010, Australia

\*corresponding author's email address: [guilhor@gmail.com](mailto:guilhor@gmail.com)

Key words: maintenance through metamorphosis, symbiosis, microbial interactions, *Drosophila*, *Saccharomyces cerevisiae*, extracellular bacteria

## Summary statement

Bacterial symbionts of *Drosophila* influence yeast maintenance through fly metamorphosis, a novel observation that may have consequences for the evolution of insect-yeast-bacteria interactions.

## 1 **Abstract**

2 Interactions between microbial symbionts of metazoan hosts are emerging as key features of  
3 symbiotic systems. Little is known about the role of such interactions on the maintenance of  
4 symbiosis through host's life cycle. We studied the influence of symbiotic bacteria on the  
5 maintenance of symbiotic yeast through metamorphosis of the fly *Drosophila melanogaster*.  
6 To this end we mimicked the development of larvae in natural fruit. In absence of bacteria  
7 yeast was never found in young adults. However, yeast could maintain through  
8 metamorphosis when larvae were inoculated with symbiotic bacteria isolated from *D.*  
9 *melanogaster* faeces. Furthermore, an Enterobacteriaceae favoured yeast transstadial  
10 maintenance. Because yeast is a critical symbiont of *D. melanogaster* flies, bacterial influence  
11 on host-yeast association may have consequences for the evolution of insect-yeast-bacteria  
12 tripartite symbiosis and their cooperation.

## 13 Introduction

14 Metazoans often form associations with non-obligatory symbiotic microorganisms. Microbial  
15 symbiont can influence host phenotype, and hosts determine symbiont multiplication and  
16 dispersal (Ferrari and Vavre, 2011). The importance of interactions between microorganisms  
17 is relatively better understood in the context of parasitism than in the context of beneficial  
18 symbionts (Alizon et al., 2013; Tollenaere et al., 2016; Z  l   et al., 2018). Beneficial microbial  
19 symbionts can nonetheless interact in a wide variety of manners (Comolli, 2014; Seth and  
20 Taga, 2014; Hassani et al., 2018) and affect both the dynamics of each microorganism and the  
21 phenotype of their host (Wargo and Hogan, 2006; Newell and Douglas, 2014; Callens et al.,  
22 2018; Gould et al., 2018; Sommer and Newell, 2019).

23 Fungi-bacteria interactions are well described microbial interactions due to their importance  
24 in human health, industry and domestic life (Kobayashi and Crouch, 2009; Jouhten et al.,  
25 2016; Carbonetto et al., 2018). In the wild, yeasts and other fungi associate with extracellular  
26 bacteria in a wide variety of habitats, including decaying plant materials where they interact  
27 with the larvae and adults of saprophagous insects such as *Drosophila* flies. Symbioses  
28 between *Drosophila* and either yeast and bacteria have however been largely studied  
29 separately. Each type of microorganism affects *Drosophila* physiology, nutrition,  
30 reproduction and behavior (Ryu et al., 2008; Anagnostou et al., 2010; Shin et al., 2011;  
31 Storelli et al., 2011; Becher et al., 2012; Broderick and Lemaitre, 2012; Wong et al., 2014)  
32 and may maintain through - a variable part of - *Drosophila* life cycle (Bakula, 1969; Starmer  
33 et al., 1988; Hoang et al., 2015; Pais et al., 2018). In natural fruit, *D. melanogaster* larval  
34 development can be impossible, or largely compromised, in absence of yeast (Becher et al.,  
35 2012), suggesting symbiosis with yeast may not be dispensable for larvae. A handful of  
36 studies considering both fungi and bacteria showed that direct interaction between yeast and  
37 bacteria can modulate fly behavior (Fischer et al., 2017) and that bacteria can affect fly  
38 attraction to yeast (Leit  o-Gon  alves et al., 2017). There is to date little data on how  
39 interactions between microbial symbionts affect their transmission from the host or  
40 maintenance among host life stages, which would have wide consequences for the ecological  
41 dynamics of the microorganisms, and consequently, the evolution of their symbiosis with  
42 flies.

43 It is established that *Drosophila* flies contribute to bacteria and yeast dynamics through  
44 effects on local multiplication and dispersal (Gilbert, 1980; Ganter, 1988; Starmer et al.,

45 1988; Chandler et al., 2012; Stamps et al., 2012; Buser et al., 2014). *Saccharomyces* yeast, for  
46 example, attracts adult flies with volatiles, these adults then acquire the microorganism and  
47 later inoculate it in fruit where larvae develop. An alternative mean of insect vectoring for  
48 symbiotic bacteria and yeast of larvae would rely on the transstadial maintenance, from the  
49 larval to the adult stage. It would enable the colonization of freshly emerged adults by larval  
50 symbionts and, provided they maintain and are shed later in life, their possible dispersal to  
51 new patches of resources. The maintenance of yeast or bacteria throughout the *Drosophila* life  
52 cycle have been investigated (Rohlf's and Hoffmeister, 2005; Pais et al., 2018), including  
53 maintenance from larvae to adults through metamorphosis (i.e. transstadial maintenance or  
54 transstadial transmission) (Bakula, 1969; Starmer et al., 1988; Ridley et al., 2012; Duneau and  
55 Lazzaro, 2018). To our knowledge, how interactions between microbial symbionts affect  
56 symbiont maintenance through *Drosophila* life stages remains however unknown. Here, we  
57 investigated the maintenance of a wild isolate of *Saccharomyces cerevisiae* yeast from larvae  
58 to young adults *Drosophila melanogaster*. We found that yeast presence in adults only  
59 occurred when larvae were associated with symbiotic bacteria and its frequency depended on  
60 the identity of these bacteria.

## 61 **Material and methods**

### 62 **Biological material**

63 We used a *Drosophila melanogaster* (Meigen, 1830) Oregon-R strain usually maintained on  
64 banana medium (233 g.L<sup>-1</sup> banana, 62 g.L<sup>-1</sup> sugar, 62 g.L<sup>-1</sup> dead yeast, 25 g.L<sup>-1</sup> ethanol, 10  
65 g.L<sup>-1</sup> agar and 5 g.L<sup>-1</sup> nipagin) at 21°C with a 14 h/10 h day-night cycle. The four bacterial  
66 strains used had been isolated from feces of adult Oregon-R flies and had been described in  
67 Guilhot et al. (2019). Bacterial strains were identified as *Staphylococcus* sp. (accession  
68 number MK461976 in the NCBI database), *Enterococcus* sp. (MK461977), an  
69 Enterobacteriaceae (MK461978) and an Actinobacteria (MK461979). The taxonomic  
70 resolution of our analyses is unfortunately modest and these bacteria do not usually dominate  
71 the *Drosophila* microbiota. However similar strains had already been identified as associated  
72 with Drosophilids (Chandler et al., 2011; Staubach et al., 2013). More importantly, microbial  
73 species and strains can evolve rapidly and with large consequences on their effects on host  
74 phenotype (Winans et al., 2017; Martino et al., 2018). For this reason, the proper description  
75 of symbiont effects on host phenotype in relevant experimental conditions (Guilhot et al.  
76 2019) may be more important than high taxonomical resolution to understand symbiosis.

77 The yeast *Saccharomyces cerevisiae* (Meyen ex Hansen, 1883) strain was isolated from a  
78 wild Drosophilid in the 'Le Domaine de l'Hortus' vineyard, near Montpellier in Southern  
79 France.

### 80 **Experimental design**

81 The main experiment was conducted on sterile vials. Each experimental unit consisted of  
82 twenty *D. melanogaster* eggs free of cultivable bacteria and yeast deposited on an artificial  
83 wound of a surface-sterilized grape berry that was inoculated, or not, with specific  
84 microorganisms. Eggs were laid by conventionally-reared *D. melanogaster* Oregon-R females  
85 on solidified grape juice, which contained the antibiotic streptomycin (1 mg.L<sup>-1</sup>, from a  
86 standard streptomycin solution of 1 mg.ml<sup>-1</sup> in 1 mM EDTA (Sigma-Aldrich ref. 85886)) in  
87 order to remove parental bacteria. Grape berries were surface-sterilized; they were hence  
88 dipped in a 2% bleach solution, rinsed with sterile water and dried before use. We ensure  
89 these procedures were efficient: no cultivable bacteria or yeast were found in surface-  
90 sterilized berries and eggs homogenates. Every grape berry received 10<sup>4</sup> *S. cerevisiae* yeast  
91 cells suspended in 10 µl. Berries inoculated with *S. cerevisiae* were then allocated to six

92 different bacterial treatments: no bacteria (control, n = 18); one of the four bacterial strains  
93 described above ( $10^4$  cells of the same type: n (*Staphylococcus*) = 13, n (*Enterococcus*) = 13,  
94 n (Enterobacteriaceae) = 11, n (Actinobacteria) = 13); and a mixture of the four bacteria  
95 ( $2.5 \times 10^3$  cells of each type, n = 9). Replicates were organized in eleven blocks launched over  
96 four days.

97 Newly formed pupae were aseptically removed daily from their larval container and placed in  
98 a sterile new vial until adult emergence. This procedure mimicked natural insect behavior as  
99 *D. melanogaster* larvae usually crawl out of their substrate before pupation (Sokolowski et al.,  
100 1986; Woltz and Lee, 2017), which incidentally prevent the exposure of young adults to the  
101 microorganisms present in the larval substrate. It was not logistically feasible to process every  
102 adult independently. We therefore elected to assess microbial content in groups of adults that  
103 emerged on the same day. For each grape berry, we randomly selected a single pupa and  
104 pooled all the adults, females as males, that emerged on the day as this pupa. This protocol  
105 allowed the detection of yeast (and bacterial) cells associated with freshly emerged adults that  
106 may have been present externally or internally. Sampled adults were homogenized in sterile  
107 PBS using a Tissue Lyser II (Qiagen) and Ø3 mm glass balls. Serially diluted fly samples  
108 were plated on Lysogeny Broth (LB) plates to count microbial cells after incubation at 24°C.  
109 Colonies of the five microbial symbionts (yeast and bacteria) were distinguished according to  
110 their morphology (see Guilhot et al. 2019).

111 Effects of bacteria on yeast development in the larval fruit may explain some of our results.  
112 We hence collected the remaining juice from grape berries two days after the formation of the  
113 last pupa. Although quantifying yeast in fruit when larvae were feeding would have been  
114 informative too, we elected to not disturb the development of the larvae and waited the larvae  
115 left their substrate. Serially diluted fruit samples were plated on LB plates to count yeast  
116 colonies at 24°C. As above, microbial colonies were distinguished based on their  
117 morphology.

118 In parallel to the main experiment, bacteria were also inoculated without yeast on cubes of  
119 laboratory medium (which contains dead yeast) following the procedure above to assess  
120 bacteria transstadial maintenance in their environment of origin (i.e. the banana medium used  
121 to rear the fly colony and described above). The six different bacterial treatments were: no  
122 bacteria (control, n = 12); one of the four bacterial strains described above (n  
123 (*Staphylococcus*) = 12, n (*Enterococcus*) = 7, n (Enterobacteriaceae) = 11, n (Actinobacteria)

124 = 11); and a mixture of the four bacteria ( $n = 14$ ). Replicates were organized in fifteen blocks  
125 launched over four days.

## 126 **Statistical analyses**

127 We hypothesized larval bacteria would affect yeast transstadial maintenance. We estimated  
128 this phenomenon in groups of 1 to 11 freshly emerged adults (median = 5, IQR = 4). Yeast-  
129 positive samples contained 1 to 150 cells per adult fly (Fig. S1). This variation was not  
130 investigated statistically due to low statistical power. Whether live yeast cells were present or  
131 not was analyzed using a generalized linear model with binomial distribution and logit link  
132 function. Tested factors comprised bacterial treatment, number of adults in the groups, yeast  
133 concentration in the fruit, age of the adults and experimental block. Statistical power did not  
134 enable testing the interaction between bacterial treatment and number of adults in the groups  
135 (but see Fig. S2). Because we used groups of adult flies it was mandatory to take into account  
136 the number of individuals per pool. The biological material employed (i.e. wild and laboratory  
137 strains and populations) informs on the factors that can influence transstadial symbiont  
138 maintenance in a qualitative fashion, but could not indicate their quantitative occurrence in  
139 the field. Backward model selection allowed to eliminate non-significant terms (i.e. yeast  
140 concentration in the fruit and age of the pooled flies) from the initial complete model.  
141 Contrasts were used to detect significant differences between bacterial treatment levels.  
142 Numbers of replicates varied among bacterial treatments due to differential larval mortality.  
143 However, the analysis of larval survival revealed no significant effect of the bacteria on this  
144 trait (Guilhot et al., 2019).

145 To study the effect of the bacterial treatment on the yeast concentration (log-transformed) in  
146 larval fruit substrate, we used a linear mixed model with Restricted Maximum Estimate  
147 Likelihood. Experimental block was defined as a random factor.

148 Analyzes were performed with JMP (SAS, 14.1).



## 149 **Results**

150 Bacterial treatment significantly affected *S. cerevisiae* presence in freshly emerged adult flies  
151 ( $\chi^2 = 20.30$ ,  $df = 5$ ,  $p = 0.001$ ). Yeast was never observed in adult flies that emerged from  
152 control treatments, unlike treatments with bacteria at the larval stage (contrast ‘All treatments  
153 with bacteria’ vs ‘Control’:  $\chi^2 = 11.2$ ,  $df = 1$ ,  $p < 0.0001$ ) (Fig. 1). Young adult flies that had  
154 developed with the Enterobacteriaceae alone or in mixture with the other bacteria were more  
155 likely to harbor live yeast cells than the other treatments with bacteria at the larval stage  
156 (contrast ‘With Enterobacteriaceae’ vs ‘All other treatments with bacteria’:  $\chi^2 = 4.52$ ,  $df = 1$ ,  $p$   
157  $= 0.03$ ) (Fig. 1). As expected, the number of individuals in the assayed pool significantly and  
158 positively affected the likelihood of yeast observation ( $\chi^2 = 7.54$ ,  $df = 1$ ,  $p = 0.01$ ) (Fig. S2) –  
159 supporting the need to include this factor in all the analyses. The age of freshly emerged adult  
160 flies ( $\chi^2 = 0.65$ ,  $df = 1$ ,  $p = 0.42$ ) and the yeast concentration in the larval medium ( $\chi^2 = 0$ ,  $df =$   
161  $1$ ,  $p = 1$ ) had not significant influence on yeast presence in adults.

162 The bacterial treatment had no significant effect on the yeast concentration in the medium two  
163 days after the formation of the last pupa ( $F_{5,49} = 1.18$ ,  $p = 0.33$ ) (Fig. 2). Yeast presence in  
164 fruit flesh was detected in all replicates but one.

165 Bacteria could be observed in young adults that emerged from most combinations of larval  
166 environment and bacterial treatment (Fig. S3). However, the proportion of bacteria-positive  
167 groups never exceeded 25%. When bacteria were detected, load varied from 1 to 33 bacterial  
168 cells per adult fly (data not analyzed statistically). The observation of the inoculated bacteria  
169 in emerged adults shows these bacteria sampled in laboratory adults reared on artificial  
170 medium could establish symbiosis with larvae, even in fruit substrate.

## 171 Discussion

172 Our most important result is that larval bacteria influenced yeast transstadial maintenance  
173 (Fig. 1). In control treatments that were not inoculated by bacteria, yeast was never found in  
174 freshly emerged adult flies. On the contrary, the presence of bacteria at the larval stage  
175 favored yeast maintenance through host metamorphosis. In particular, inoculation by the  
176 Enterobacteriaceae bacterium (alone or in mixture) led to greater *S. cerevisiae* transstadial  
177 maintenance than the other bacterial treatments (Fig. 1). The propensity to favor yeast  
178 maintenance hence seemed to vary among bacteria.

179 It is well known that coinfecting symbionts (mutualistic as parasitic) often affect each other's  
180 horizontal transmission to new hosts in holometabolous insects (Azambuja et al., 2005;  
181 Fellous and Koella, 2009; Gendrin and Christophides, 2013; Hegde et al., 2015) and other  
182 multicellular organisms (Azambuja et al., 2005; Lass et al., 2013; Barret et al., 2016; Bonnet  
183 et al., 2017; Z  l   et al., 2018). However, we know a single other case of microbial interactions  
184 affecting symbiont maintenance through complete metamorphosis: in *Galleria mellonella*  
185 butterflies, the bacterium *Enterococcus mundtii* interacts with host immunity during the pupal  
186 stage to shape adult bacterial microbiota (Johnston and Rolff, 2015). Although we used fresh  
187 fruit and a wild yeast strain, flies and bacteria were laboratory sourced. Our experiment hence  
188 shows bacteria affect yeast transstadial maintenance in *D. melanogaster*, but further work will  
189 be necessary to unveil the pervasiveness of this phenomenon in the field.

190 What mechanisms may underlie symbiont transstadial maintenance, and how did bacteria  
191 affect it? The maintenance of *S. cerevisiae* yeast and several bacterial strains through  
192 *Drosophila* metamorphosis are congruent with previous reports of the transstadial  
193 maintenance of extracellular microbial symbionts in Drosophilids (Bakula, 1969; Starmer et  
194 al., 1988; Ridley et al., 2012; Duneau and Lazzaro, 2018; T  fit et al., 2018), other Dipterans  
195 (Radvan, 1960; Capuzzo et al., 2005; Rochon et al., 2005; Damiani et al., 2008; Lauzon et al.,  
196 2009; Gendrin and Christophides, 2013; Nayduch and Burrus, 2017; Majumder et al., 2020)  
197 and other holometabolous insects (Hammer and Moran, 2019). Microbial symbionts could  
198 maintain on inner or outer walls of the pupal chamber (Kaltenpoth et al., 2010; Wang and  
199 Rozen, 2017). In *Drosophila melanogaster*, bacterial cells of *Escherichia coli* were found  
200 associated with the inner pupal membrane (Bakula, 1969). Alternatively, adults might retrieve  
201 symbionts by consuming their own meconium - the remaining of larval midgut that is  
202 excreted right after adult emergence (Moll et al., 2001; Broderick and Lemaitre, 2012;

203 Gendrin and Christophides, 2013). The mechanism of bacterial influence on yeast  
204 maintenance through metamorphosis is not trivial either. The Enterobacteriaceae that favored  
205 yeast maintenance, despite presenting a wide metabolic spectrum (Guilhot et al., 2019),  
206 probably not improved fruit quality by concentrating or synthesizing nutrients (Ramiro et al.,  
207 2016) as had no significant effect on fly phenotype in this context (Guilhot et al., 2019).  
208 Besides, the concentration of yeast cells in fruit did not correlated with the presence of yeast  
209 in the freshly emerged adults and was not affected by the bacterial treatment (Fig. 2). This  
210 lack of quantitative relationships suggests yeast maintenance through metamorphosis may be  
211 determined by qualitative processes rather than mere cell numbers. Several bacteria are  
212 known to interact with *Drosophila* host signaling (e.g. Shin et al., 2011; Storelli et al., 2011).  
213 Symbiotic bacteria could therefore elicit host or yeast physiological responses in a way that  
214 would affect the likelihood of transstadial maintenance.

215 Yeast transstadial maintenance in *D. melanogaster* may have consequences for the spatial  
216 spread of the yeast and the evolution of the symbiosis. Yeast needs active transport by insect  
217 vectors to disperse among the ephemeral patch of resources formed by fruits (Starmer and  
218 Lachance, 2011). *Drosophila* adults contribute to such yeast dispersal through two non-  
219 excluding mechanisms. First, it is well established that yeasts produce chemical volatiles that  
220 attract adult flies (Palanca et al., 2013; Buser et al., 2014; Scheidler et al., 2015; Anagnostou  
221 et al., 2016; Bellutti et al., 2018; Günther et al., 2019; Lewis and Hamby, 2019), which favors  
222 their acquisition and vectoring by insects to new resource patches (Buser et al., 2014).  
223 Whether this phenomenon reflects yeast adaptation to insect vectoring is however debated  
224 (Günther and Goddard, 2019). Second, yeast maintenance through *Drosophila* metamorphosis  
225 - as demonstrated here - would enable the dispersal to new resource patches of larval  
226 symbionts (e.g. fruit, possibly infested with insect larvae) by colonized emerging adults. Such  
227 continuity in symbiosis over the life-cycle selects larval symbionts for beneficial effects on  
228 host fitness (Ebert, 2013). The microbial strains the most beneficial to larval development (for  
229 example in terms of larval survival) would be the ones best dispersed to new resources  
230 patches by the vigorous or numerous adult hosts they favored the development of.  
231 Furthermore, the maintenance of larval microbial symbionts until adult emergence may also  
232 benefit the host as freshly emerged adults could be less susceptible to opportunistic pathogens  
233 due to symbiont prior presence (Blum et al., 2013; Johnston and Rolff, 2015; Obadia et al.,  
234 2017). To conclude, transstadial maintenance of larval symbionts has implication for the  
235 dynamics and evolution of both hosts and microorganisms, the effects of bacteria on yeast we

236 report may therefore affect important aspects of symbiosis. These are new and anticipated  
237 consequences of insect association with bacteria.

238 Symbiont-symbiont interactions are emerging as key features of numerous taxa (Ferrari and  
239 Vavre, 2011; Álvarez-Pérez et al., 2019, Mathé-Hubert et al., 2019), including *Drosophila*  
240 flies (Fischer et al., 2017; Gould et al., 2018). Studying microbial symbionts one by one may  
241 be more tractable, however our experiment illustrates understanding the nature and diversity  
242 of host-symbiont relationships necessitates encompassing the complexity of natural  
243 communities.

## 244 **Acknowledgements**

245 We thank Edouard Jurkevitch, Natacha Kremer and Elodie Vercken for critical reading of an  
246 earlier version of this manuscript and Laure Benoit, Marie-Pierre Chapuis, Romain Gallet and  
247 Philippe Gautier for methodological help.

248

## 249 **Competing interests**

250 No competing interests declared.

251

## 252 **Author contributions**

253 R.G., A.R. and S.F. designed the experiment. R.G., A.R., A.X. and S.F. ran the experiment.

254 K.H. collected the yeast isolate. R.G. and S.F. analyzed the data and wrote the manuscript.

255

## 256 **Funding**

257 This work was supported by French National Research Agency through the ‘SWING’ project  
258 (ANR-16-CE02-0015) and by Agropolis Fondation under the reference ID 1505-002 through  
259 the ‘Investissements d’avenir’ program (Labex Agro: ANR-10-LABX-0001-01).

260

## 261 **Data availability**

262 The dataset is available in the open data repository Zenodo (doi: 10.5281/zenodo.3546129)  
263 (Guilhot et al., 2020).

## References

Alizon, S., De Roode, J.C. and Michalakis, Y. (2013). Multiple infections and the evolution of virulence. *Ecology letters* **16**, 556-567.

Álvarez-Pérez, S., Lievens, B. and Fukami, T. (2019). Yeast–bacterium interactions: the next frontier in nectar research. *Trends in plant science* **24**, 393-401.

Anagnostou, C., Dorsch, M. and Rohlf, M. (2010). Influence of dietary yeasts on *Drosophila melanogaster* life-history traits. *Entomologia Experimentalis et Applicata* **136**, 1-11.

Azambuja, P., Garcia, E.S. and Ratcliffe, N.A. (2005). Gut microbiota and parasite transmission by insect vectors. *Trends in parasitology* **21**, 568-572.

Bakula, M. (1969). The persistence of a microbial flora during postembryogenesis of *Drosophila melanogaster*. *Journal of invertebrate pathology* **14**, 365-374.

Barret, M., Guimbaud, J.F., Darrasse, A. and Jacques M.A. (2016). Plant microbiota affects seed transmission of phytopathogenic micro-organisms. *Mol. Plant. Pathol.* **17**, 791-795.

Becher, P.G., Flick, G., Rozpedowska, E., Schmidt, A., Hagman, A., Lebreton, S., Larsson, M.C., Hansson, B.S., Piškur, J. and Bengtsson, M. (2012). Yeast, not fruit volatiles mediate *Drosophila melanogaster* attraction, oviposition and development. *Functional Ecology* **26**, 822-828.

Bellutti, N., Gallmetzer, A., Innerebner, G., Schmidt, S., Zelger, R. and Koschier, E.H. (2018). Dietary yeast affects preference and performance in *Drosophila suzukii*. *Journal of pest science* **91**, 651-660.

Blum, J.E., Fischer, C.N., Miles, J. and Handelsman, J. (2013). Frequent replenishment sustains the beneficial microbiome of *Drosophila melanogaster*. *MBio* **4**, e00860-13.

Bonnet, S.I., Binetruy, F., Hernández-Jarguín, A.M. and Duron, O. (2017). The tick microbiome: why non-pathogenic microorganisms matter in tick biology and pathogen transmission. *Frontiers in Cellular and Infection Microbiology* **7**, 236.

Broderick, N.A. and Lemaitre, B. (2012). Gut-associated microbes of *Drosophila melanogaster*. *Gut microbes* **3**, 307-321.

Buser, C.C., Newcomb, R.D., Gaskett, A.C. and Goddard, M.R. (2014). Niche construction initiates the evolution of mutualistic interactions. *Ecology Letters* **17**, 1257-1264.

Callens, M., Watanabe, H., Kato, Y., Miura, J. and Decaestecker, E. (2018). Microbiota inoculum composition affects holobiont assembly and host growth in *Daphnia*. *Microbiome* **6**, 56.

Capuzzo, C., Firrao, G., Mazzon, L., Squartini, A. and Girolami, V. (2005). ‘*Candidatus Erwinia dacicola*’, a coevolved symbiotic bacterium of the olive fly *Bactrocera oleae* (Gmelin). *International journal of systematic and evolutionary microbiology* **55**, 1641-1647.

Carbonetto, B., Ramsayer, J., Nidelet, T., Legrand, J. and Sicard, D. (2018). Bakery yeasts, a new model for studies in ecology and evolution. *Yeast* **35**, 591-603.

Chandler, J. A., Lang, J. M., Bhatnagar, S., Eisen, J. A., and Kopp A. (2011). Bacterial communities of diverse *Drosophila* species: ecological context of a host–microbe model system. *PLoS Genetics* **7**, e1002272.

Chandler, J.A., Eisen, J.A. and Kopp, A. (2012). Yeast communities of diverse *Drosophila* species: comparison of two symbiont groups in the same hosts. *Appl. Environ. Microbiol.* **78**, 7327-7336.

Comolli, L.R. (2014). Intra-and inter-species interactions in microbial communities. *Frontiers in microbiology* **5**, 629.

Damiani, C., Ricci, I., Crotti, E., Rossi, P., Rizzi, A., Scuppa, P., Esposito, F., Bandi, C., Daffonchio, D. and Favia, G. (2008). Paternal transmission of symbiotic bacteria in malaria vectors. *Current Biology* **18**, R1087-R1088.

Duneau, D.F. and Lazzaro, B.P. (2018). Persistence of an extracellular systemic infection across metamorphosis in a holometabolous insect. *Biology letters* **14**, 20170771.

Ebert, D. (2013). The epidemiology and evolution of symbionts with mixed-mode transmission. *Annual Review of Ecology, Evolution, and Systematics* **44**, 623-643.

Fellous, S. and Koella, J.C. (2009). Infectious dose affects the outcome of the within-host competition between parasites. *The American Naturalist* **173**, E177-E184.

Ferrari, J. and Vavre, F. (2011). Bacterial symbionts in insects or the story of communities affecting communities. *Philosophical Transactions of the Royal Society B: Biological Sciences* **366**, 1389-1400.

Fischer, C.N., Trautman, E.P., Crawford, J.M., Stabb, E.V., Handelsman, J. and Broderick, N.A. (2017). Metabolite exchange between microbiome members produces compounds that influence *Drosophila* behavior. *Elife* **6**, e18855.

Ganter, P.F. (1988). The vectoring of cactophilic yeasts by *Drosophila*. *Oecologia* **75**, 400-404.

Gendrin, M. and Christophides, G.K. (2013). The *Anopheles* mosquito microbiota and their impact on pathogen transmission. In *Anopheles mosquitoes-New insights into Malar. vectors*. InTech.

Gilbert, D.G. (1980). Dispersal of yeasts and bacteria by *Drosophila* in a temperate forest. *Oecologia* **46**, 135-137.

Gould, A.L., Zhang, V., Lamberti, L., Jones, E.W., Obadia, B., Korasidis, N., Gavryushkin, A., Carlson, J.M., Beerenwinkel, N. and Ludington, W.B. (2018). Microbiome interactions shape host fitness. *Proceedings of the National Academy of Sciences* **115**, E11951-E11960.

Guilhot, R., Rombaut, A., Xuéreb, A., Howell, K. and Fellous, S. (2019). Environmental specificity in *Drosophila*-bacteria symbiosis affects host developmental plasticity. *bioRxiv* doi:10.1101/717702, version 3: peer-reviewed and recommended by *PCI Evolutionary Biology* doi:10.24072/pci.evolbiol.100085

Guilhot, R., Rombaut, A., Xuéreb, A., Howell, K. and Fellous, S. (2020). Data from: Bacterial influence on the maintenance of symbiotic yeast through *Drosophila* metamorphosis. *Zenodo*. <https://zenodo.org/record/3546129#.Xpjl7XvgrIV>

Günther, C.S. and Goddard, M.R. (2019) Do yeasts and *Drosophila* interact just by chance? *Fungal Ecology* **38**, 37-43.

Günther, C.S., Knight, S.J., Jones, R. and Goddard, M.R. (2019). Are *Drosophila* preferences for yeasts stable or contextual? *Ecology and evolution* **9**, 8075-8086.



Hammer, T.J. and Moran, N.A. (2019). Links between metamorphosis and symbiosis in holometabolous insects. *Philosophical Transactions of the Royal Society B* **374**, 20190068.

Hassani, M.A., Durán, P. and Hacquard, S. (2018). Microbial interactions within the plant holobiont. *Microbiome* **6**, 58.

Hegde, S., Rasgon, J.L. and Hughes, G.L. (2015). The microbiome modulates arbovirus transmission in mosquitoes. *Current opinion in virology* **15**, 97-102.

Hoang, D., Kopp, A., and Chandler, J. A. (2015). Interactions between *Drosophila* and its natural yeast symbionts - Is *Saccharomyces cerevisiae* a good model for studying the fly-yeast relationship? *PeerJ* **3**, e1116.

Johnston, P.R. and Rolff, J. (2015). Host and symbiont jointly control gut microbiota during complete metamorphosis. *PLoS Pathogens* **11**, e1005246.

Jouhten, P., Ponomarova, O., Gonzalez, R. and Patil, K.R. (2016). *Saccharomyces cerevisiae* metabolism in ecological context. *FEMS yeast research* **16**, fow080.

Kaltenpoth, M., Goettler, W., Koehler, S. and Strohm, E. (2010). Life cycle and population dynamics of a protective insect symbiont reveal severe bottlenecks during vertical transmission. *Evolutionary ecology* **24**, 463-477.

Kobayashi, D.Y. and Crouch, J.A. (2009). Bacterial/fungal interactions: from pathogens to mutualistic endosymbionts. *Annual review of phytopathology* **47**, 63-82.

Lass, S., Hudson, P.J., Thakar, J., Saric, J., Harvill, E., Albert, R. and Perkins, S.E. (2013). Generating super-shedders: co-infection increases bacterial load and egg production of a gastrointestinal helminth. *Journal of the Royal Society Interface* **10**, 20120588.

Lauzon, C.R., McCombs, S.D., Potter, S.E. and Peabody, N.C. (2009). Establishment and vertical passage of *Enterobacter (Pantoea) agglomerans* and *Klebsiella pneumoniae* through all life stages of the Mediterranean fruit fly (Diptera: Tephritidae). *Annals of the Entomological Society of America* **102**, 85 – 95.

Leitão-Gonçalves, R., Carvalho-Santos, Z., Francisco, A.P., Fioreze, G.T., Anjos, M., Baltazar, C., Elias, A.P., Itskov, P.M., Piper, M.D.W. and Ribeiro, C. (2017). Commensal

bacteria and essential amino acids control food choice behavior and reproduction. *PLoS Biology* **15**, e2000862.

Lewis, M.T. and Hamby, K.A. (2019). Differential impacts of yeasts on feeding behavior and development in larval *Drosophila suzukii* (Diptera: Drosophilidae). *Scientific reports* **9**, 1-12.

Majumder, R., Sutcliffe, B., Taylor, P.W. and Chapman, T.A. (2020). Microbiome of the Queensland fruit fly through metamorphosis. *Microorganisms* **8**, 795.

Martino, M.E., Joncour, P., Leenay, R., Gervais, H., Shah, M., Hughes, S., Gillet, B., Beisel, C. and Leulier, F. (2018). *Cell host & microbe* **24**, 109-119.

Mathé-Hubert, H., Kaech, H., Hertaeg, C., Jaenike, J. and Vorburger, C. (2019). Nonrandom associations of maternally transmitted symbionts in insects: The roles of drift versus biased cotransmission and selection. *Molecular ecology* **28**, 5330-5346.

Moll, R.M., Romoser, W.S., Modrakowski, M.C., Moncayo, A.C. and Lerdthusnee, K. (2001). Meconial peritrophic membranes and the fate of midgut bacteria during mosquito (Diptera: Culicidae) metamorphosis. *Journal of medical entomology* **38**, 29-32.

Nayduch, D. and Burrus, R.G. (2017). Flourishing in filth: house fly–microbe interactions across life history. *Annals of the Entomological Society of America* **110**, 6-18.

Newell, P.D. and Douglas, A.E. (2014). Interspecies interactions determine the impact of the gut microbiota on nutrient allocation in *Drosophila melanogaster*. *Appl. Environ. Microbiol.* **80**, 788-796.

Obadia, B., Güvener, Z.T., Zhang, V., Ceja-Navarro, J.A., Brodie, E.L., William, W.J. and Ludington, W.B. (2017). Probabilistic invasion underlies natural gut microbiome stability. *Current Biology* **27**, 1999-2006.

Pais, I.S., Valente, R.S., Sporniak, M. and Teixeira, L. (2018). *Drosophila melanogaster* establishes a species-specific mutualistic interaction with stable gut-colonizing bacteria. *PLoS Biology* **16**, e2005710.

Palanca, L., Gaskett, A.C., Günther, C.S., Newcomb, R.D. and Goddard, M.R. (2013). Quantifying variation in the ability of yeasts to attract *Drosophila melanogaster*. *PLoS One* **8**, e75332.

- Ramiro, R.S., Pollitt, L.C., Mideo, N. and Reece, S.E. (2016). Facilitation through altered resource availability in a mixed-species rodent malaria infection. *Ecology letters* **19**, 1041-1050.
- Radvan, R. (1960). Persistence of bacteria during development in flies. *Folia Microbiologica* **5**, 50.
- Ridley, E.V., Wong, A.C., Westmiller, S. and Douglas, A.E. (2012). Impact of the resident microbiota on the nutritional phenotype of *Drosophila melanogaster*. *PloS One* **7**, e36765.
- Rochon, K., Lysyk, T.J. and Selinger, L.B. (2005). Retention of *Escherichia coli* by house fly and stable fly (Diptera: Muscidae) during pupal metamorphosis and eclosion. *Journal of medical entomology* **42**, 397 – 403.
- Rohlf, M. and Hoffmeister, T.S. (2005). Maternal effects increase survival probability in *Drosophila subobscura* larvae. *Entomologia Experimentalis et Applicata* **117**, 51-58.
- Ryu, J.H., Kim, S.H., Lee, H.Y., Bai, J.Y., Nam, Y.D., Bae, J.W., Lee, D.G., Shin, S.C., Ha, E.M. and Lee, W.J. (2008). Innate immune homeostasis by the homeobox gene *caudal* and commensal-gut mutualism in *Drosophila*. *Science* **319**, 777-782.
- Scheidler, N.H., Liu, C., Hamby, K.A., Zalom, F.G. and Syed, Z. (2015). Volatile codes: correlation of olfactory signals and reception in *Drosophila*-yeast chemical communication. *Scientific reports* **5**, 14059.
- Seth, E.C. and Taga, M.E. (2014). Nutrient cross-feeding in the microbial world. *Frontiers in microbiology* **5**, 350.
- Shin, S.C., Kim, S.H., You, H., Kim, B., Kim, A.C., Lee, K.A., Yoon, J.H., Ryu, J.H. and Lee, W.J. (2011). *Drosophila* microbiome modulates host developmental and metabolic homeostasis via insulin signaling. *Science* **334**, 670-674.
- Sokolowski, M.B., Bauer, S.J., Wai-Ping, V., Rodriguez, L., Wong, J.L. and Kent, C. (1986). Ecological genetics and behaviour of *Drosophila melanogaster* larvae in nature. *Animal Behaviour* **34**, 403-408.

Sommer, A.J. and Newell, P.D. (2019). Metabolic basis for mutualism between gut bacteria and its impact on the *Drosophila melanogaster* host. *Appl. Environ. Microbiol.* **85**, e01882-18.

Stamps, J.A., Yang, L.H., Morales, V.M. and Boundy-Mills, K.L. (2012). *Drosophila* regulate yeast density and increase yeast community similarity in a natural substrate. *PLoS One* **7**, e42238.

Starmer, W.T., Peris, F. and Fontdevila, A. (1988). The transmission of yeasts by *Drosophila buzzatii* during courtship and mating. *Animal behaviour* **36**, 1691-1695.

Starmer, W.T. and Lachance, M.A. (2011). Yeast ecology. In *The Yeasts: a Taxonomic Study*, pp. 65-83. Elsevier, Waltham, MA.

Staubach, F., Baines, J. F., Künzel, S., Bik, E. M. and Petrov, D. A. (2013). Host species and environmental effects on bacterial communities associated with *Drosophila* in the laboratory and in the natural environment. *PLoS One* **8**, e70749.

Storelli, G., Defaye, A., Erkosar, B., Hols, P., Royet, J. and Leulier, F. (2011). *Lactobacillus plantarum* promotes *Drosophila* systemic growth by modulating hormonal signals through TOR-dependent nutrient sensing. *Cell metabolism* **14**, 403-414.

Téfit, M.A., Gillet, B., Joncour, P., Hughes, S. and Leulier, F. (2018). Stable association of a *Drosophila*-derived microbiota with its animal partner and the nutritional environment throughout a fly population's life cycle. *Journal of insect physiology* **106**, 2-12.

Tollenaere, C., Susi, H. and Laine, A.L. (2016). Evolutionary and epidemiological implications of multiple infection in plants. *Trends in plant science* **21**, 80-90.

Wang, Y. and Rozen, D.E. (2017). Gut microbiota colonization and transmission in the burying beetle *Nicrophorus vespilloides* throughout development. *Appl. Environ. Microbiol.* **83**, e03250-16.

Wargo, M.J. and Hogan, D.A. (2006). Fungal - bacterial interactions: a mixed bag of mingling microbes. *Current opinion in microbiology* **9**, 359-364.

Winans, N.J., Walter, A., Chouaia, B., Chaston, J.M., Douglas, A.E. and Newell, P.D. (2017). A genomic investigation of ecological differentiation between free-living and *Drosophila*-associated bacteria. *Molecular ecology* **26**, 4536-4550.

Woltz, J.M. and Lee, J.C. (2017). Pupation behavior and larval and pupal biocontrol of *Drosophila suzukii* in the field. *Biological control* **110**, 62-69.

Wong, A.C.N., Dobson, A.J. and Douglas, A.E. (2014). Gut microbiota dictates the metabolic response of *Drosophila* to diet. *Journal of Experimental Biology* **217**, 1894-1901.

Zélé, F., Magalhães, S., Kéfi, S. and Duncan, A.B. (2018). Ecology and evolution of facilitation among symbionts. *Nature communications* **9**, 4869.

## Figures

**Fig. 1. Transstadial maintenance of *Saccharomyces cerevisiae* in response to bacterial treatment.** Symbols indicate the proportion of groups of freshly emerged adult flies containing yeast per bacterial treatment (n = number of adult groups per bacterial treatment). 95% binomial confidence intervals were calculated using normal approximation method. These results are qualitative as we used groups of adult flies to estimate yeast transstadial maintenance (Fig S2).

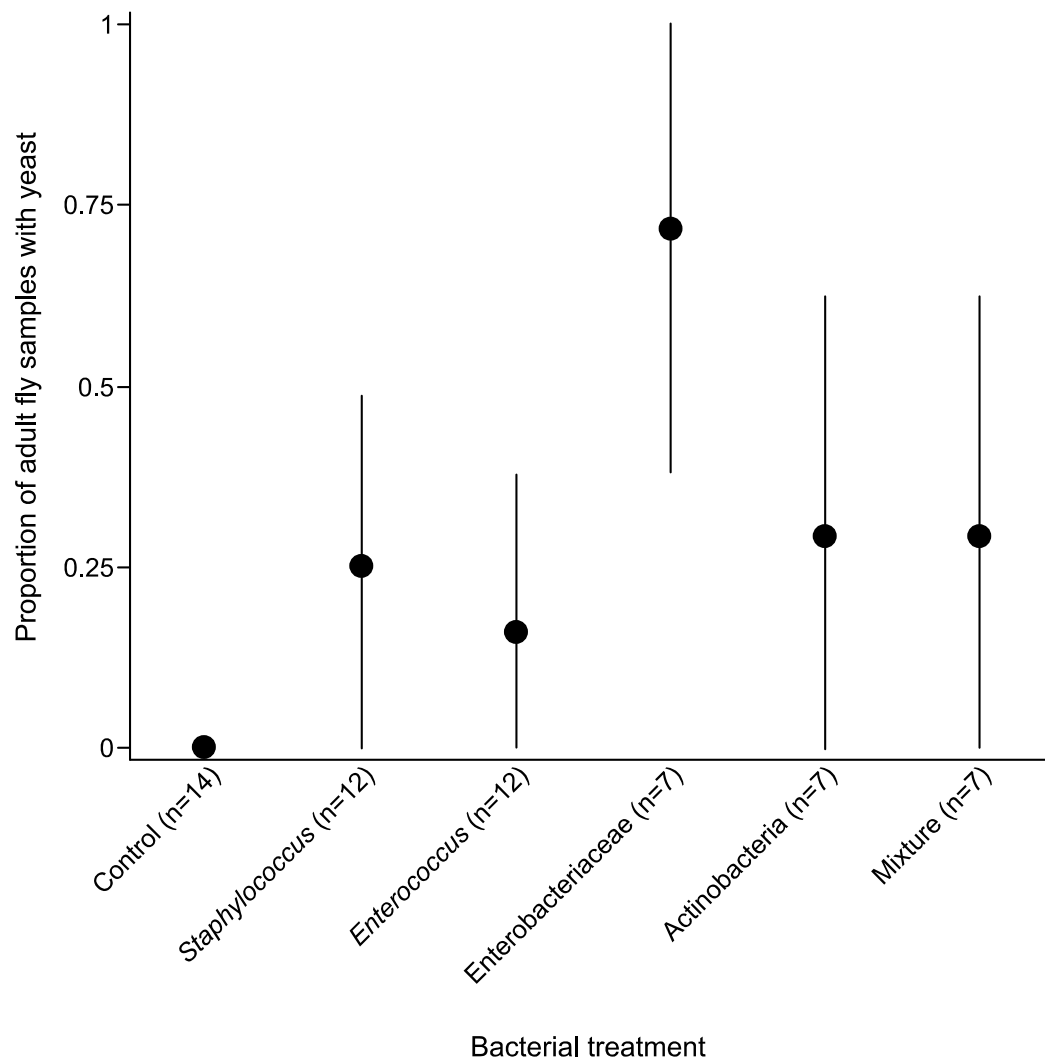

**Fig. 2. Yeast concentration in grape berry flesh after the formation of the last pupa.** Concentration is expressed in number of yeast cells per 200  $\mu$ l of fruit flesh. Symbols indicate mean  $\pm$  s.e.m.

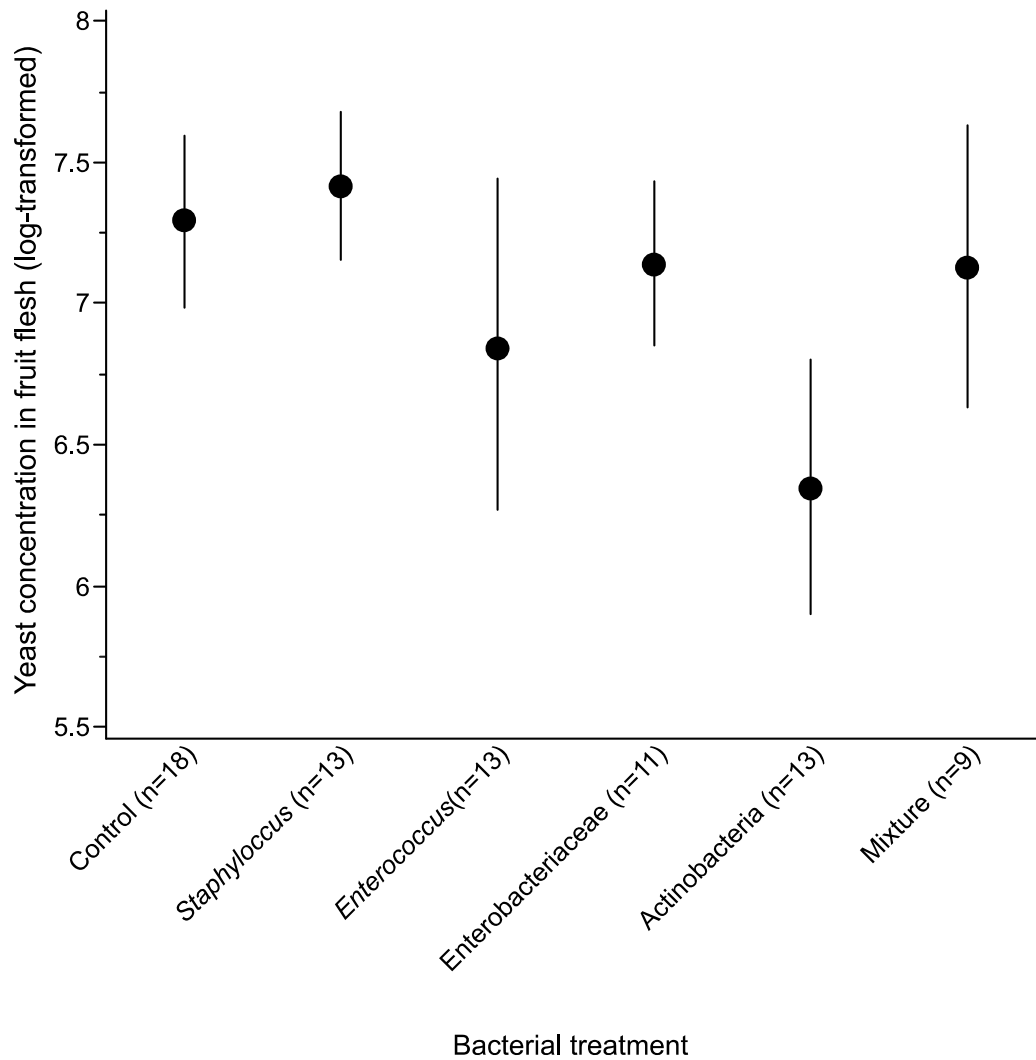

Source: https://www.biorxiv.org/content/biorxiv/early/2020/06/01/2020.05.31.126185.1.full.pdf
